# Supplementary material for: FeV LDH Coated on Sandpaper as an Electrode Material for High-Performance Flexible Energy Storage Devices
Source: MDPI journal article supplement (doi:10.3390/polym15051136), 2023-02-24
Supplement: s1 [file s1]

## Table of contents

- S1. Areal capacity values of synthesized electrodes.
- S2. BET and BJH study of all the electroactive materials.
- S3. Surface area and pore size of synthesized samples.
- S4. SEM analysis of FeV-LDH before and after cycling stability study.
- S5. Preparation and electrochemical performance of AC//SP negative electrode.
- S6. Comparison of the obtained HSC device energy storage properties with the previously reported HSC/asymmetric device performances.
- S7. Optical images of HSC device at different bending positions.

### S1. Areal capacity values of synthesized electrodes

Table S1. Areal capacity values of synthesized electrodes.

| Sample                               | Areal capacity (mAh/cm <sup>2</sup> ) |
|--------------------------------------|---------------------------------------|
| Bare Ni                              | 0.011                                 |
| Fe                                   | 0.016                                 |
| Fe <sub>0.75</sub> V <sub>0.25</sub> | 0.091                                 |
| Fe <sub>0.5</sub> V <sub>0.5</sub>   | 0.058                                 |
| Fe <sub>0.25</sub> V <sub>0.75</sub> | 0.045                                 |
| V                                    | 0.025                                 |

### S2. BET and BJH study of all the electroactive materials.

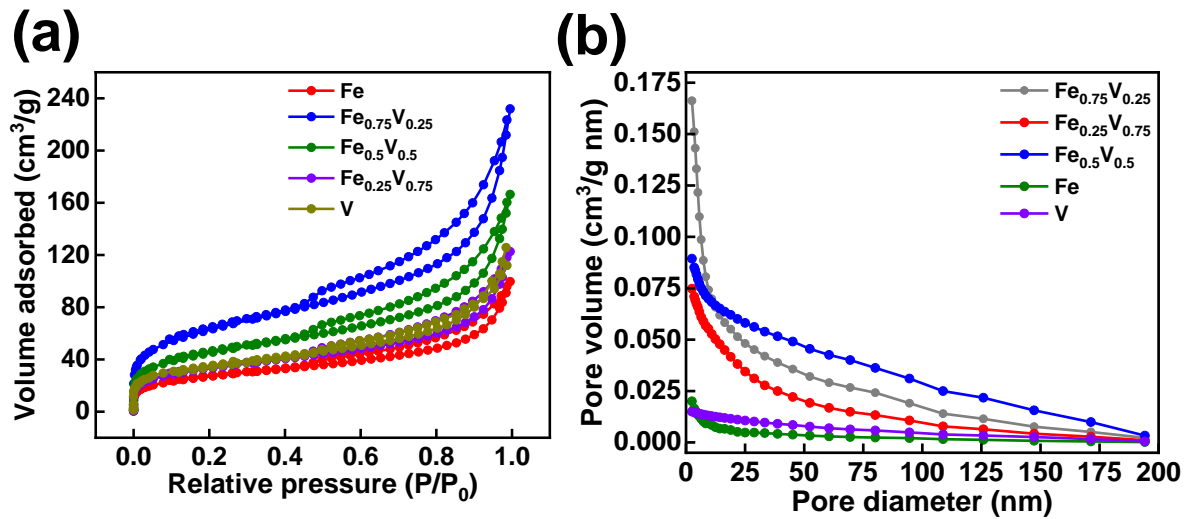

Figure S1. (a) Brunauer-Emmett-Teller (BET) nitrogen adsorption-desorption isotherm and (b) Barrett-Joyner-Halenda (BJH) pore size distribution curve of all the electroactive materials (i.e., Fe, Fe<sub>0.75</sub>V<sub>0.25</sub>, Fe<sub>0.5</sub>V<sub>0.5</sub>, and Fe<sub>0.25</sub>V<sub>0.75</sub>, and V).

### S3. Surface area and pore size of synthesized samples.

Table S2. Surface area and pore size of synthesized samples.

| Sample                               | Surface area (m <sup>2</sup> /g) | Pore size (nm) |
|--------------------------------------|----------------------------------|----------------|
| Fe                                   | 21.55                            | 12.07          |
| Fe <sub>0.75</sub> V <sub>0.25</sub> | 98.63                            | 1.48           |
| Fe <sub>0.5</sub> V <sub>0.5</sub>   | 63.21                            | 5.53           |
| Fe <sub>0.25</sub> V <sub>0.75</sub> | 44.58                            | 6.52           |
| V                                    | 36.21                            | 9.78           |

#### S4. SEM analysis of FeV-LDH before and after cycling stability study.

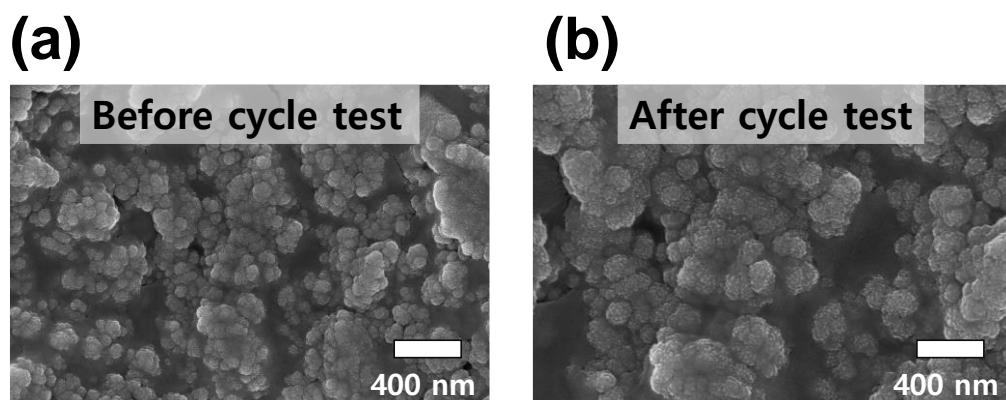

**Figure S2.** SEM images of FeV LDH electrode (a) before GCD cycle stability study, (b) after 5,000 GCD cycles at 20 mA/cm<sup>2</sup>.

#### S5. Preparation and electrochemical performance of AC//SP negative electrode.

Deposition of activated carbon on sand paper (AC//SP) was carried out using a simple slurry coating method. The active material (AC), super P carbon, and PVDF binder were reserved in a weight ratio of 80:10:10 and mixed thoroughly using an agate mortar with the help of few drops of N-methyl 2-Pyrrolidone (NMP) solvent till the thick uniform slurry formation. Then the slurry was distributed on sand paper substrate (1x1 cm<sup>2</sup>) followed by vacuum drying at 80 °C for 4 h. Electrochemical properties of AC//SP negative electrode were explored with the aid of cyclic voltammetry (CV), galvanostatic charge/discharge (GCD) in 1 M KOH electrolyte using an Iviumstat electrochemical workstation (IVIUM Technologies). CV plots were recorded at various sweep rates ranging from 10 to 50 mV/s within a potential window of -1 to 0 V. As explained from Figure S1a, the CV plots are in quasi-rectangle shapes, signifying the capacitive behavior of the electrode. Similar behavior is detected in GCD plots of the electrode recorded at different current densities varying from 3 mA/cm<sup>2</sup> to 10 mA/cm<sup>2</sup> (Figure S1b) with triangular shaped curves.

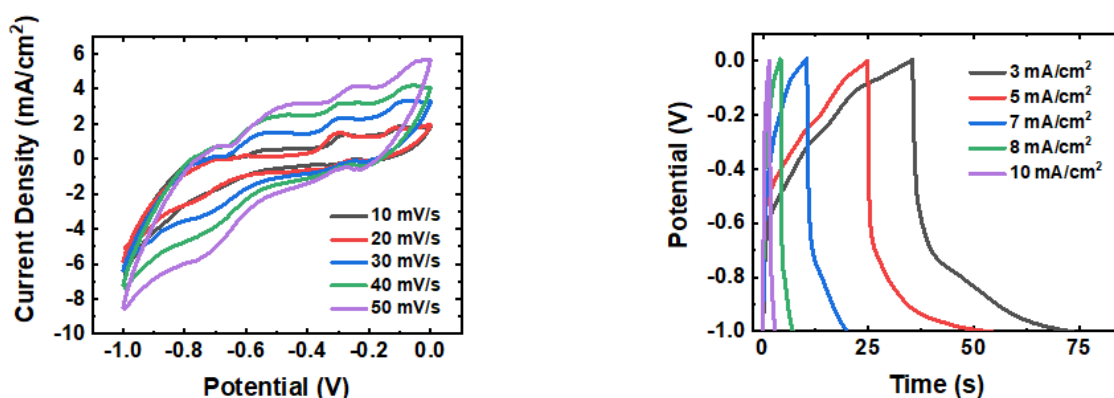

**Figure S3.** (a) CV curves of AC//SP electrode at different sweep rates varying from 10 to 50 mV/s, and (b) GCD curves of AC//SP electrode at various current densities ranging from 3 to 10 mA/cm<sup>2</sup>.

**S6. Comparison of the obtained HSC device energy storage properties with the previously reported HSC/asymmetric device performances.**

**Table S3.** Comparison of the obtained HSC device energy storage properties with the previously reported HSC/asymmetric device performances.

| References | Substrate  | Electrolyte | Active material                      | Energy density            | Power density         |
|------------|------------|-------------|--------------------------------------|---------------------------|-----------------------|
| Ref [38]   | Ni foam    | 2M KOH      | MnFe                                 | 44.9 $\mu\text{W h/cm}^2$ | 16 $\text{mW/cm}^2$   |
| Ref [39]   | Ni foam    | 2M KOH      | ZnCo                                 | 0.22 $\text{mW/cm}^2$     | 9 $\text{mW/cm}^2$    |
| Ref [40]   | Ni foam    | 2M KOH      | NiAl                                 | 0.22 $\text{mWh/cm}^2$    | 4.5 $\text{mW/cm}^2$  |
| Ref [41]   | Ni foam    | 2M KOH      | Ag                                   | 0.569 $\text{mWh/cm}^2$   | 3.82 $\text{mW/cm}^2$ |
| Ref [42]   | Ni foam    | 3M KOH      | Co <sub>2</sub> Al                   | 0.102 $\text{mWh/cm}^2$   | 0.75 $\text{mW/cm}^2$ |
| Our study  | Sand paper | 1M KOH      | Fe <sub>0.75</sub> V <sub>0.25</sub> | 0.123 $\text{mWh/cm}^2$   | 23.8 $\text{mW/cm}^2$ |

**S7. Optical images of HSC device at different bending positions.**

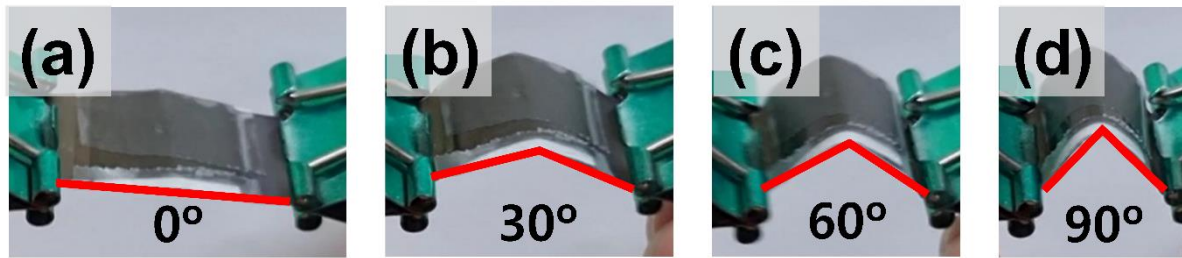

**Figure S4.** Optical image of the HSC at flat and bending states and the definition of bending angle. (a) flat state, bending angle (b) 30°, (c) 60°, and (d) 90°.
